# Supplementary material
Source: publisher figshare collection journal article supplement (https://gsajournals.figshare.com/ndownloader/files/25468373)
Supplement: Supplementary file 1 [file 25468373]

**Table S1. Strains used in this study**

| **Strain name and genotype** | **Description** |
| --- | --- |
| **TWF154** | Wild type *A. oligospora*; parental strain |
| **TWF1083** *ku70*::*hph* | Replacement of *KU70* (EYR41_000878) locus with HygR cassette in TWF154; *KU70* deletion strain |
| **TWF2074** *ste7*::*hph* | *STE7* (EYR41_011623)deletion strain |
| **TWF3391** *ste7*::*hph STE7-nat1* | *STE7* complementation strain |
| **TWF1703** *ku70*::*hph fus3::nat1* | *FUS3* (EYR41_011934) deletion strain |
| **TWF2080** *ku70*::*hph fus3::nat1* *FUS3-neo* | *FUS3* complementation strain |
| **TWF1701** *ku70*::*hph ste12::nat1* | *STE12* (EYR41_007450) deletion strain (Independent clone 1) |
| **TWF1702** *ku70*::*hph ste12::nat1* | *STE12* deletion strain (Independent clone 2) |
| **TWF2082** *ku70*::*hph ste12::nat1 STE12-neo* | *STE12* complementation strain |
| **TWF3393** *slt2*::*hph* | *SLT2* (EYR41_004559) deletion strain |
| **TWF3394** *slt2*::*hph SLT2-nat1* | *SLT2* complementation strain |
| **TWF1047** *bck1*::*hph* | *BCK1* (EYR41_003178) deletion strain |
